# Supplementary material for: Combined TGA-MS kinetic analysis of multistep processes. Thermal decomposition and ceramification of polysilazane and polysiloxane preceramic polymers
Source: Royal Society of Chemistry journal article supplement (doi:10.1039/c6cp03677e), 2016-01-01
Supplement: c6cp03677e1.pdf [file c6cp03677e1.pdf]

## **SUPPLEMENTARY INFORMATION**

### **ANALYSIS OF RAMAN SPECTRA**

Figure 2 in the main text includes the Raman spectra, which provides information about the structural organization of the free carbon phase in PDCs. The representative features of free carbon in Raman spectra are the so called disorder induced D band at approximately  $1350\text{ cm}^{-1}$  and the G band at approximately  $1580\text{ cm}^{-1}$  due to in-plane bond stretching of  $\text{sp}^2$  carbon.

Figure 2a shows that up to 1023 K the Raman spectra of the TTCS derived powders exhibit no significant feature due to a completely amorphous carbon phase,<sup>79</sup> while in the Raman spectrum obtained after pyrolysing up to 1273 K both the D and G bands appear due to the formation of free carbon nanocrystalline clusters and G'-band,<sup>74-78</sup>. Figure 2b includes the Raman spectra of the residues obtained of the pyrolysed CERASET precursor. In these residues, no significant features are noticed even at 1273 K, with only a very broad band due to a completely amorphous carbon phase. The lack of features of the Raman spectra obtained of the Ceraset derived SiCN ceramic might be striking at first since that composition usually exhibits well defined D and G bands at that temperature. However, it should be noted that samples reported in literature are mostly prepared by heating the crosslinked precursor in a furnace up to 900-1000°C for at least 1 or 2 hours in order to complete the ceramification process. In our case, we have measured the Raman spectra on powder samples retrieved directly from the TGA instrument after heating at a given temperature (550, 750 and 1000°C) and then quenched to stop the reaction. This shows that just reaching 1000 °C is not enough to fully develop the nanocrystalline structure of the free carbon in the ceramic but keeping the temperature for a minimum time might be necessary.

We have used the same Ceraset precursor to fabricate cylindrical pellets using more conventional procedures (heating up to 1000 to 1400 °C and keeping the temperatures for 2 hours in a conventional furnace). In those cases we obtained the usual Raman spectra observed in these compositions, as shown in the figure below:

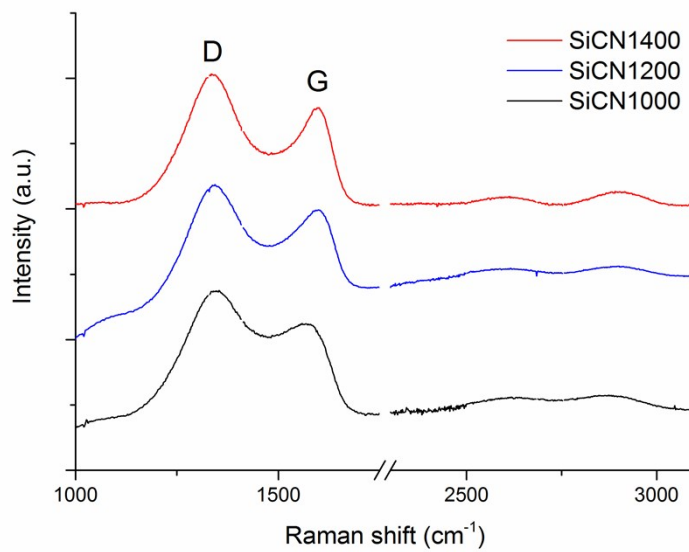

However, SiCO ceramics display reasonably well-defined D and G peaks after the same experimental procedure. This different behavior might be explained in terms of free carbon content, which is slightly under 20% in SiCN and about 35% in SiCO. It would be reasonable to assume that the formation of the nanocrystalline carbon domains large enough to be observed by Raman would be favoured in a composition with a higher carbon content.

## ANALYSIS OF FTIR SPECTRA

Figure 3a in the main text shows the FTIR spectra of the cross-linked TTCS polymer and the subsequent powders obtained at 823 K, 1023 K and 1273 K. The figure shows the gradual transformation of the initial polymeric network into the final SiCO ceramic. Initially, the polymer network features bands at  $\sim 800\text{-}900\text{ cm}^{-1}$  are observed due to vibrations of Si-H bonds,<sup>80</sup> as well as bands at  $2880\text{ cm}^{-1}$  and  $1140\text{ cm}^{-1}$ , which are related to ethylene groups<sup>80</sup>. Such bands decrease in intensity with the temperature as the organic groups are cleaved and released, and are completely absent in the powder obtained at 1023 K. The bands at  $2960$ ,  $1406$  and  $1260\text{ cm}^{-1}$  are produced by  $\text{CH}_3$  groups<sup>80</sup> and also decrease with the pyrolysis temperature. The rearrangements of the bands at  $1030\text{ cm}^{-1}$  due to Si-O bond asymmetric stretching vibrations<sup>80</sup> can be observed. The spectrum of the final SiCO ceramic shows only broad bands at  $1031$ ,  $823$  and  $452\text{ cm}^{-1}$  corresponding to of Si-O and Si-C bonds vibrations. Figure 3b includes the FTIR spectra of the cross-linked CERASET polymer and the powders pyrolysed at 823 K, 1023 K and 1273 K. The spectra recorded for the powders collected at 823K presents features bands that can be attributed to N-H ( $3383\text{ cm}^{-1}$ ), Si-H ( $2129\text{ cm}^{-1}$ ), Si-N ( $794$  and  $898\text{ cm}^{-1}$ ), C-H ( $2900$ ,  $2957$  and  $3048\text{ cm}^{-1}$ ),  $\text{CH}=\text{CH}_2$  ( $1593\text{ cm}^{-1}$ ) and Si- $\text{CH}_3$  ( $1255\text{ cm}^{-1}$ ). At 1023 K most of the aforementioned bands are absent and only appear broad bands at  $750\text{-}1200\text{ cm}^{-1}$ ,  $2129\text{ cm}^{-1}$  and  $3000\text{-}3400\text{ cm}^{-1}$ , attributed to Si-N, Si-H and N-H respectively<sup>81</sup>. At 1273 K only the broad Si-N band is noticeable.

## KINETIC ANALYSIS – DECONVOLUTION OF EXPERIMENTAL COMPLEX CURVES

**Table S1.** Fitting parameters ( $a_0$ ,  $a_1$ ,  $a_2$  y  $a_3$ ) obtained by Fraser-Suzuki deconvolution of the experimental kinetic curve obtained for the thermal decomposition of TTCS precursor curves using Peakfit software.

| THERMAL DECOMPOSITION TTCS PRECURSOR |            |       |       |            |       |       |
|--------------------------------------|------------|-------|-------|------------|-------|-------|
| PROCESS 1                            |            |       |       |            |       |       |
|                                      | $a_0$      | $a_1$ | $a_2$ | $a_3$      | Area  | $r^2$ |
| 2 K/min                              | 0.00025    | 759   | 66    | -0.10      | 55.41 | 0.998 |
| 5 K/min                              | 0.00061    | 775   | 70    | -0.10      | 43.10 | 0.997 |
| 7.5 K/min                            | 0.00091    | 789   | 69    | -0.04      | 59.73 | 0.998 |
| 10 K/min                             | 0.00124    | 791   | 69    | -0.01      | 61.88 | 0.998 |
| PROCESS 2                            |            |       |       |            |       |       |
|                                      | $a_0$      | $a_1$ | $a_2$ | $a_3$      | Area  | $r^2$ |
| 2 K/min                              | 0.000115   | 820   | 85    | -0.05      | 33.14 | 0.998 |
| 5 K/min                              | 0.000255   | 838   | 85    | -0.03      | 40.85 | 0.997 |
| 7.5 K/min                            | 0.00035585 | 854   | 85    | -0.08      | 28.81 | 0.998 |
| 10 K/min                             | 0.00045245 | 858   | 82    | -2.345E-09 | 26.94 | 0.998 |
| PROCESS 3                            |            |       |       |            |       |       |
|                                      | $a_0$      | $a_1$ | $a_2$ | $a_3$      | Area  | $r^2$ |
| 2 K/min                              | 4.0833E-05 | 979   | 105   | -0.6       | 11.45 | 0.998 |
| 5 K/min                              | 0.000098   | 999   | 110   | -0.6       | 16.05 | 0.997 |
| 7.5 K/min                            | 0.00013869 | 1015  | 110   | -0.6       | 11.46 | 0.998 |
| 10 K/min                             | 0.000177   | 1027  | 115   | -0.55      | 11.18 | 0.998 |

**Table S2.** Fitting parameters ( $a_0$ ,  $a_1$ ,  $a_2$  y  $a_3$ ) obtained by Fraser-Suzuki deconvolution of the experimental kinetic curve obtained for the thermal decomposition of CERASET precursor curves using peakfit software.

**THERMAL DECOMPOSITION CERASET PRECURSOR**

| <b>PROCESS 1</b> |                         |                         |                         |                         |             |                         |
|------------------|-------------------------|-------------------------|-------------------------|-------------------------|-------------|-------------------------|
|                  | <b><math>a_0</math></b> | <b><math>a_1</math></b> | <b><math>a_2</math></b> | <b><math>a_3</math></b> | <b>Area</b> | <b><math>r^2</math></b> |
| <b>1 K/min</b>   | 0.000057                | 707                     | 89                      | -0.09                   | 30.57       | 0.991                   |
| <b>2 K/min</b>   | 0.000098                | 727                     | 92                      | -0.09                   | 27.82       | 0.996                   |
| <b>5 K/min</b>   | 0.000246                | 755                     | 92                      | -0.09                   | 28.30       | 0.997                   |
| <b>10 K/min</b>  | 0.000490                | 767                     | 90                      | -0.09                   | 27.72       | 0.994                   |
| <b>PROCESS 2</b> |                         |                         |                         |                         |             |                         |
|                  | <b><math>a_0</math></b> | <b><math>a_1</math></b> | <b><math>a_2</math></b> | <b><math>a_3</math></b> | <b>Area</b> | <b><math>r^2</math></b> |
| <b>1 K/min</b>   | 0.000022                | 784                     | 70                      | -0.06                   | 9.33        | 0.991                   |
| <b>2 K/min</b>   | 0.000034                | 807                     | 70                      | -0.01                   | 7.32        | 0.996                   |
| <b>5 K/min</b>   | 0.000085                | 835                     | 70                      | -0.06                   | 7.46        | 0.997                   |
| <b>10 K/min</b>  | 0.000175                | 856                     | 80                      | -0.06                   | 8.79        | 0.994                   |
| <b>PROCESS 3</b> |                         |                         |                         |                         |             |                         |
|                  | <b><math>a_0</math></b> | <b><math>a_1</math></b> | <b><math>a_2</math></b> | <b><math>a_3</math></b> | <b>Area</b> | <b><math>r^2</math></b> |
| <b>1 K/min</b>   | 0.000063                | 864                     | 110                     | -0.01                   | 41.93       | 0.991                   |
| <b>2 K/min</b>   | 0.000130                | 878                     | 110                     | -0.01                   | 43.99       | 0.996                   |
| <b>5 K/min</b>   | 0.000312                | 903                     | 110                     | -0.01                   | 42.95       | 0.997                   |
| <b>10 K/min</b>  | 0.000596                | 922                     | 120                     | -0.01                   | 44.82       | 0.994                   |
| <b>PROCESS 4</b> |                         |                         |                         |                         |             |                         |
|                  | <b><math>a_0</math></b> | <b><math>a_1</math></b> | <b><math>a_2</math></b> | <b><math>a_3</math></b> | <b>Area</b> | <b><math>r^2</math></b> |

|                 |          |      |     |       |       |       |
|-----------------|----------|------|-----|-------|-------|-------|
| <b>1 K/min</b>  | 0.000034 | 943  | 90  | -0.06 | 18.17 | 0.991 |
| <b>2 K/min</b>  | 0.000068 | 972  | 100 | -0.06 | 20.87 | 0.996 |
| <b>5 K/min</b>  | 0.000170 | 1000 | 100 | -0.06 | 21.29 | 0.997 |
| <b>10 K/min</b> | 0.000297 | 1023 | 100 | -0.06 | 18.67 | 0.994 |

## FIGURES

**Fig. S1** Powders obtained during the ceramification TTCS precursor at 823, 1023 and 1273 K and initial cross-linked precursor. The evolution of colour is observed in figure.

**Fig. S2 a)** XRD spectra obtained for all the initial cross-linked TTCS precursor and the powders collected after interrupting the pyrolysis at 823, 1023, 1273 K. **b)** XRD spectra obtained for all the initial cross-linked CERASET precursor and the powders collected after interrupting the pyrolysis at 823, 1023, 1273 K.

**Fig. S3. a)** SEM images of the TTCS cross-linked precursor before ceramification and **b)** TTCS pyrolysed powder obtained at 1273K. **c)** SEM images of the CERASET cross-linked precursor before ceramification and **d)** CERASET pyrolysed powder obtained at 1273K.

**Fig. S4** Experimental Kinetic curves ( $d\alpha/dt$ -T and signals  $m/z$ ) obtained for the thermal decomposition of TTCS under Ar gas flow and linear heating rate 2 K min<sup>-1</sup> and registered flow gas in spectrometer mass during the thermal decomposition

**Fig. S5** Experimental Kinetic curves ( $d\alpha/dt$ -T and signals  $m/z$ ) obtained for the thermal decomposition of TTCS under Ar gas flow and linear heating rate 7.5 K min<sup>-1</sup> and registered flow gas in spectrometer mass during the thermal decomposition

**Fig. S6a** Experimental kinetic curve (symbols) obtained for the thermal decomposition of TTCS at linear heating rate 2 K min<sup>-1</sup> and the Fraser-Suzuki function (solid line) used for fitting the simulated curves. Three independent stages are plotted with dotted lines. Correlation coefficient has been included into the figure.

**Fig. S6b.** Experimental kinetic curve (symbols) obtained for the thermal decomposition of TTCS at linear heating rate 7.5 K min<sup>-1</sup> and the Fraser-Suzuki function (solid line) used for fitting the simulated curves. Three independent stages are plotted with dotted lines. Correlation coefficient has been included into the figure.

**Fig. S6c.** Experimental kinetic curve (symbols) obtained for the thermal decomposition of TTCS at linear heating rate 10 K min<sup>-1</sup> and the Fraser-Suzuki function (solid line) used for fitting the simulated curves. Three independent stages are plotted with dotted lines. Correlation coefficient has been included into the figure.

**Fig. S7.** Experimental Kinetic curves ( $d\alpha/dt$ -T and signals  $m/z$ ) obtained for the thermal decomposition of CERASET under Ar gas flow and linear heating rate 2 K min<sup>-1</sup> and registered flow gas in spectrometer mass during the thermal decomposition.

**Fig. S8.** Experimental Kinetic curves ( $da/dt$ -T and signals  $m/z$ ) obtained for the thermal decomposition of CERASET under Ar gas flow and linear heating rate  $10\text{ K min}^{-1}$  and registered flow gas in spectrometer mass during the thermal decomposition.

**Fig. S9a.** Experimental kinetic curve (symbols) obtained for the thermal decomposition of CERASET at linear heating rate  $1\text{ K min}^{-1}$  and the Fraser-Suzuki function (solid line) used for fitting the simulated curves. Four independent stages are plotted with dotted lines. Correlation coefficient has been included into the figure.

**Fig. S9b.** Experimental kinetic curve (symbols) obtained for the thermal decomposition of CERASET at linear heating rate  $2\text{ K min}^{-1}$  and the Fraser-Suzuki function (solid line) used for fitting the simulated curves. Four independent stages are plotted with dotted lines. Correlation coefficient has been included into the figure.

**Fig. S9c.** Experimental kinetic curve (symbols) obtained for the thermal decomposition of CERASET at linear heating rate  $10\text{ K min}^{-1}$  and the Fraser-Suzuki function (solid line) used for fitting the simulated curves. Four independent stages are plotted with dotted lines. Correlation coefficient has been included into the figure.

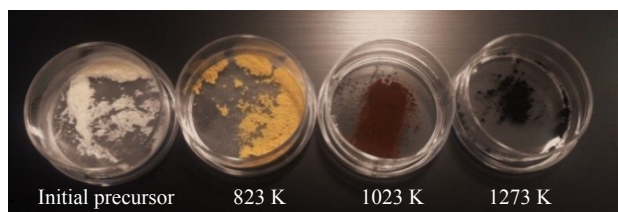

**Fig. S1** Powders obtained during the ceramification TTCS precursor at 823, 1023 and 1273 K and initial cross-linked precursor. The evolution of colour is observed in figure.

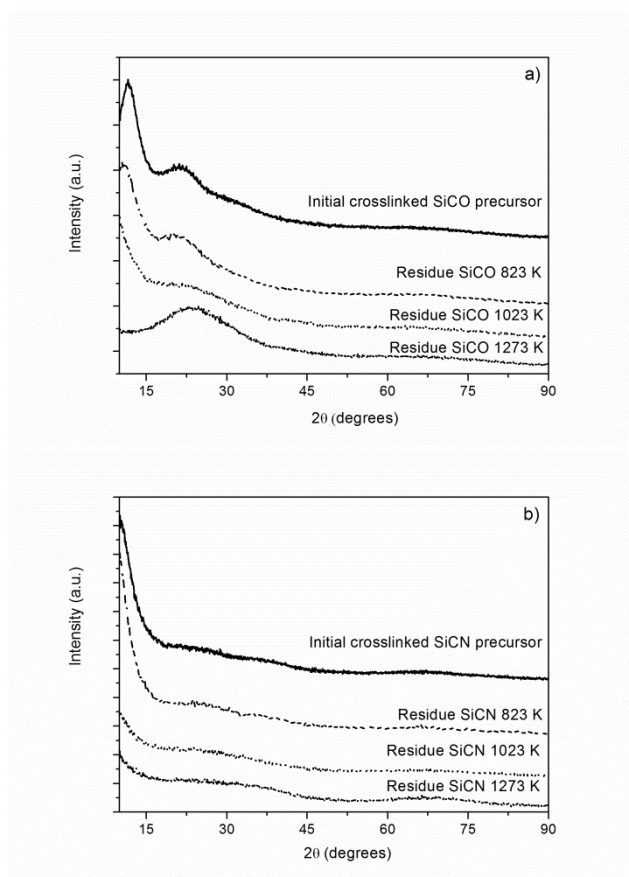

**Fig. S2 a)** XRD spectra obtained for all the initial cross-linked TTCS precursor and the powders collected after interrupting the pyrolysis at 823, 1023, 1273 K. **b)** XRD spectra obtained for all the initial cross-linked CERASET precursor and the powders collected after interrupting the pyrolysis at 823, 1023, 1273 K.

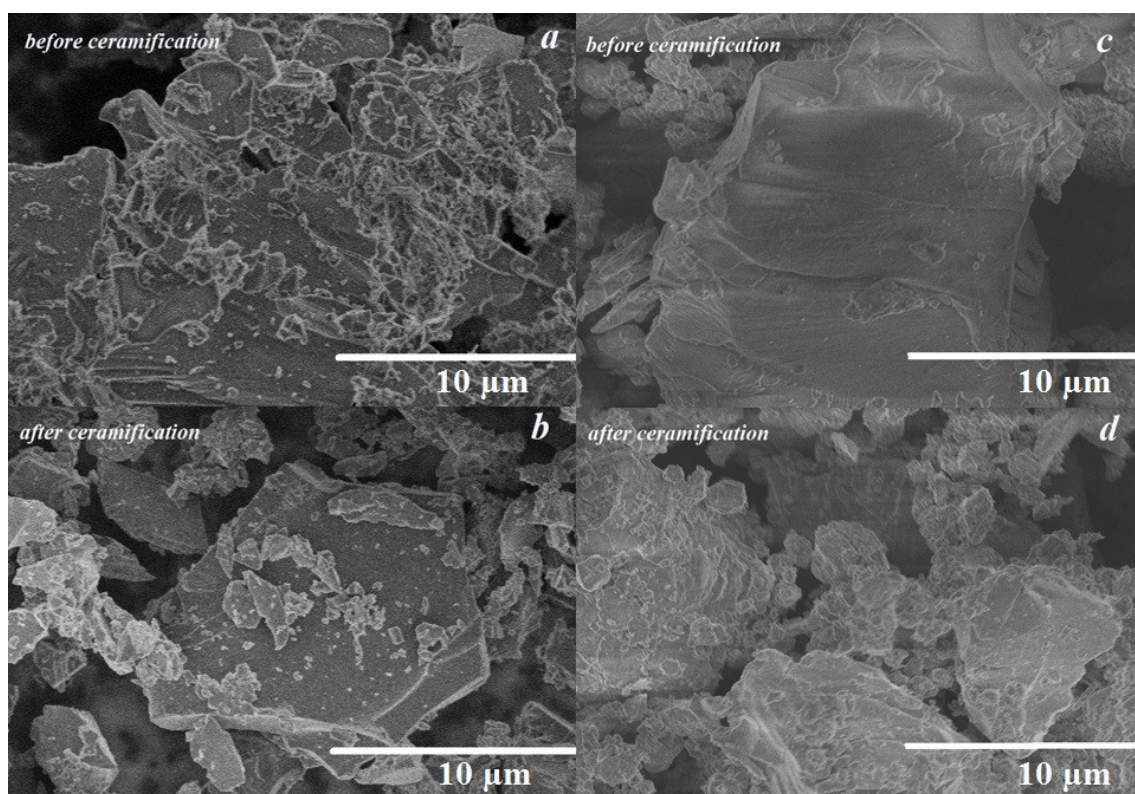

**Fig. S3.** **a)** SEM images of the TTCS cross-linked precursor before ceramification and **b)** TTCS pyrolysed powder obtained at 1273K. **c)** SEM images of the CERASET cross-linked precursor before ceramification and **d)** CERASET pyrolysed powder obtained at 1273K.

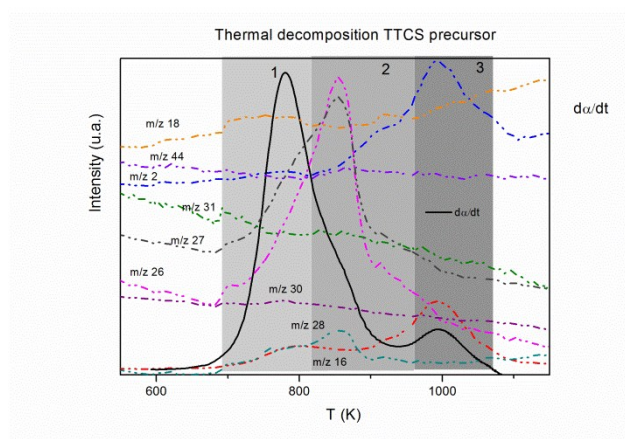

**Fig. S4** Experimental Kinetic curves ( $d\alpha/dt$ -T and signals  $m/z$ ) obtained for the thermal decomposition of TTCS under Ar gas flow and linear heating rate  $2\text{ K min}^{-1}$  and registered flow gas in spectrometer mass during the thermal decomposition

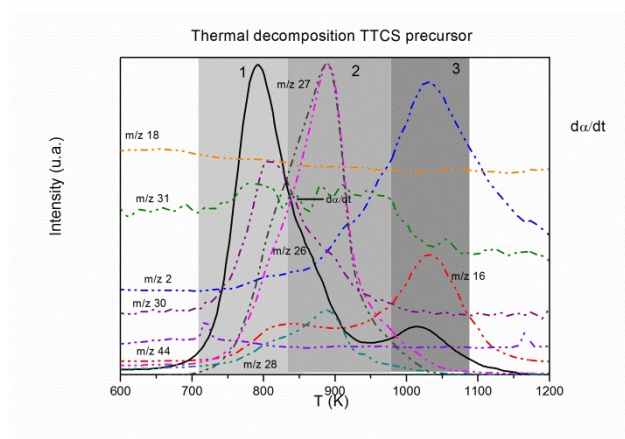

**Fig. S5** Experimental Kinetic curves ( $d\alpha/dt$ -T and signals  $m/z$ ) obtained for the thermal decomposition of TTCS under Ar gas flow and linear heating rate  $7.5\text{ K min}^{-1}$  and registered flow gas in spectrometer mass during the thermal decomposition

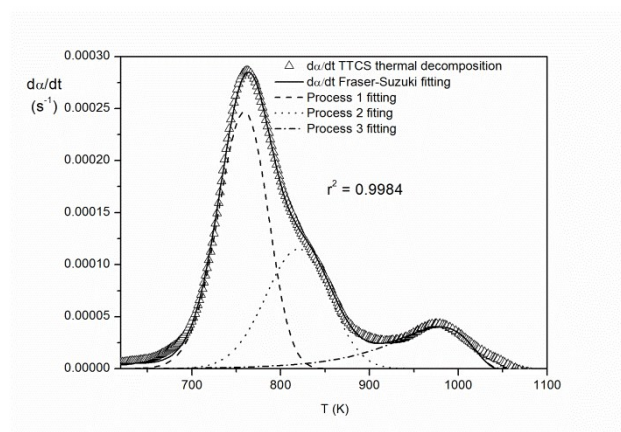

**Fig. S6a** Experimental kinetic curve (symbols) obtained for the thermal decomposition of TTCS at linear heating rate 2 K min<sup>-1</sup> and the Fraser-Suzuki function (solid line) used for fitting the simulated curves. Three independent stages are plotted with dotted lines. Correlation coefficient has been included into the figure.

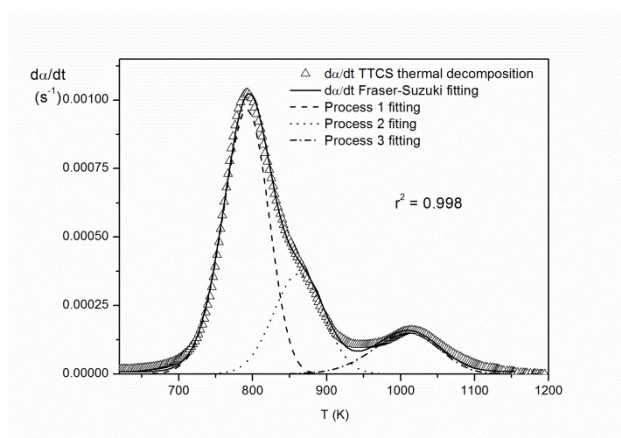

**Fig. S6b.** Experimental kinetic curve (symbols) obtained for the thermal decomposition of TTCS at linear heating rate 7.5 K min<sup>-1</sup> and the Fraser-Suzuki function (solid line) used for fitting the simulated curves. Three independent stages are plotted with dotted lines. Correlation coefficient has been included into the figure.

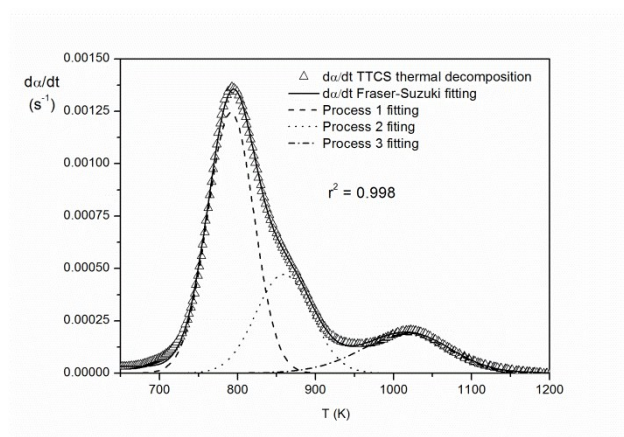

**Fig. S6c.** Experimental kinetic curve (symbols) obtained for the thermal decomposition of TTCS at linear heating rate  $10\text{ K min}^{-1}$  and the Fraser-Suzuki function (solid line) used for fitting the simulated curves. Three independent stages are plotted with dotted lines. Correlation coefficient has been included into the figure.

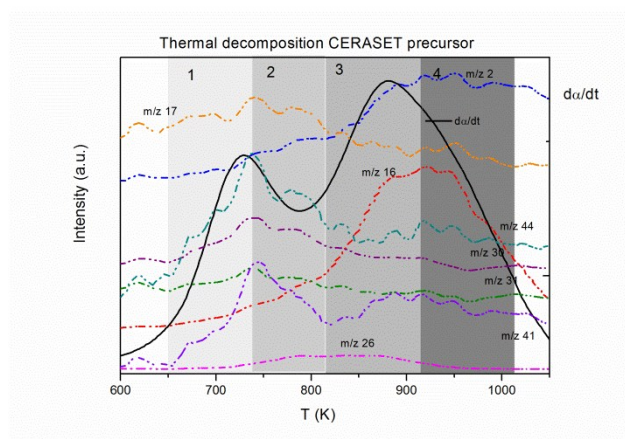

**Fig. S7.** Experimental Kinetic curves ( $d\alpha/dt$ -T and signals  $m/z$ ) obtained for the thermal decomposition of CERASET under Ar gas flow and linear heating rate  $2\text{ K min}^{-1}$  and registered flow gas in spectrometer mass during the thermal decomposition.

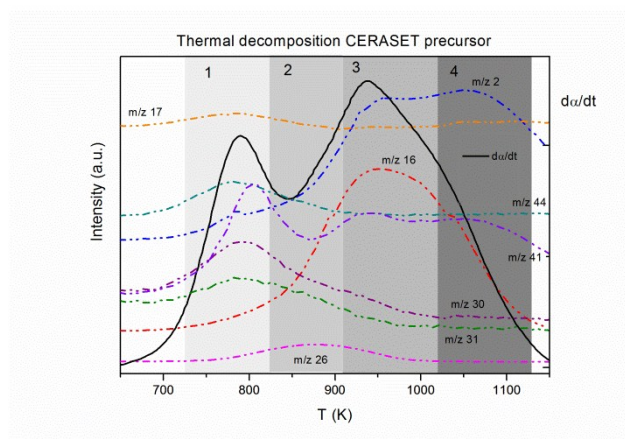

**Fig. S8.** Experimental Kinetic curves ( $d\alpha/dt$ -T and signals  $m/z$ ) obtained for the thermal decomposition of CERASET under Ar gas flow and linear heating rate  $10\text{ K min}^{-1}$  and registered flow gas in spectrometer mass during the thermal decomposition.

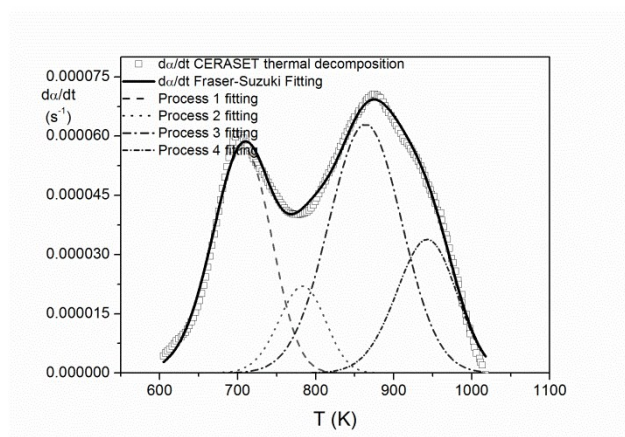

**Fig. S9a.** Experimental kinetic curve (symbols) obtained for the thermal decomposition of CERASET at linear heating rate  $1 \text{ K min}^{-1}$  and the Fraser-Suzuki function (solid line) used for fitting the simulated curves. Four independent stages are plotted with dotted lines. Correlation coefficient has been included into the figure.

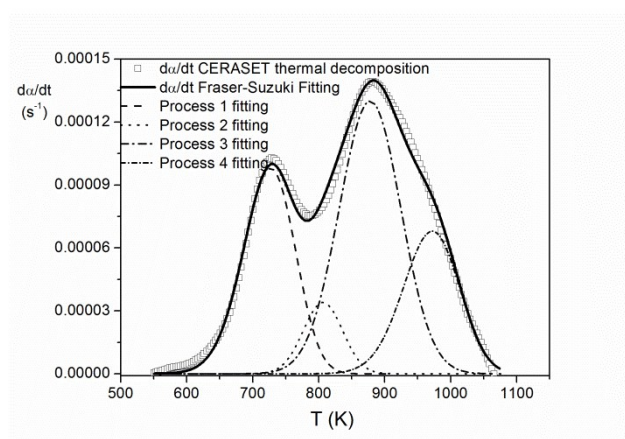

**Fig. S9b.** Experimental kinetic curve (symbols) obtained for the thermal decomposition of CERASET at linear heating rate  $2 \text{ K min}^{-1}$  and the Fraser-Suzuki function (solid line) used for fitting the simulated curves. Four independent stages are plotted with dotted lines. Correlation coefficient has been included into the figure.

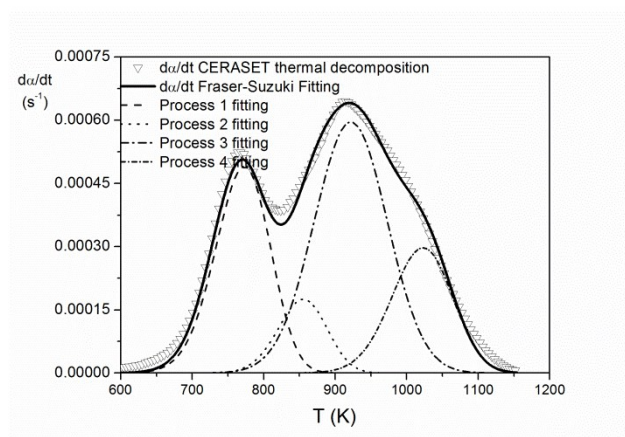

**Fig. S9c.** Experimental kinetic curve (symbols) obtained for the thermal decomposition of CERASET at linear heating rate  $10 \text{ K min}^{-1}$  and the Fraser-Suzuki function (solid line) used for fitting the simulated curves. Four independent stages are plotted with dotted lines. Correlation coefficient has been included into the figure.
